# Supplementary material for: A novel approach for human whole transcriptome analysis based on absolute gene expression of microarray data
Source: PeerJ journal article supplement (doi:10.7717/peerj.4133), 2017-12-08
Supplement: figure_s2.pdf [file figure_s2.pdf]

**Frequency**

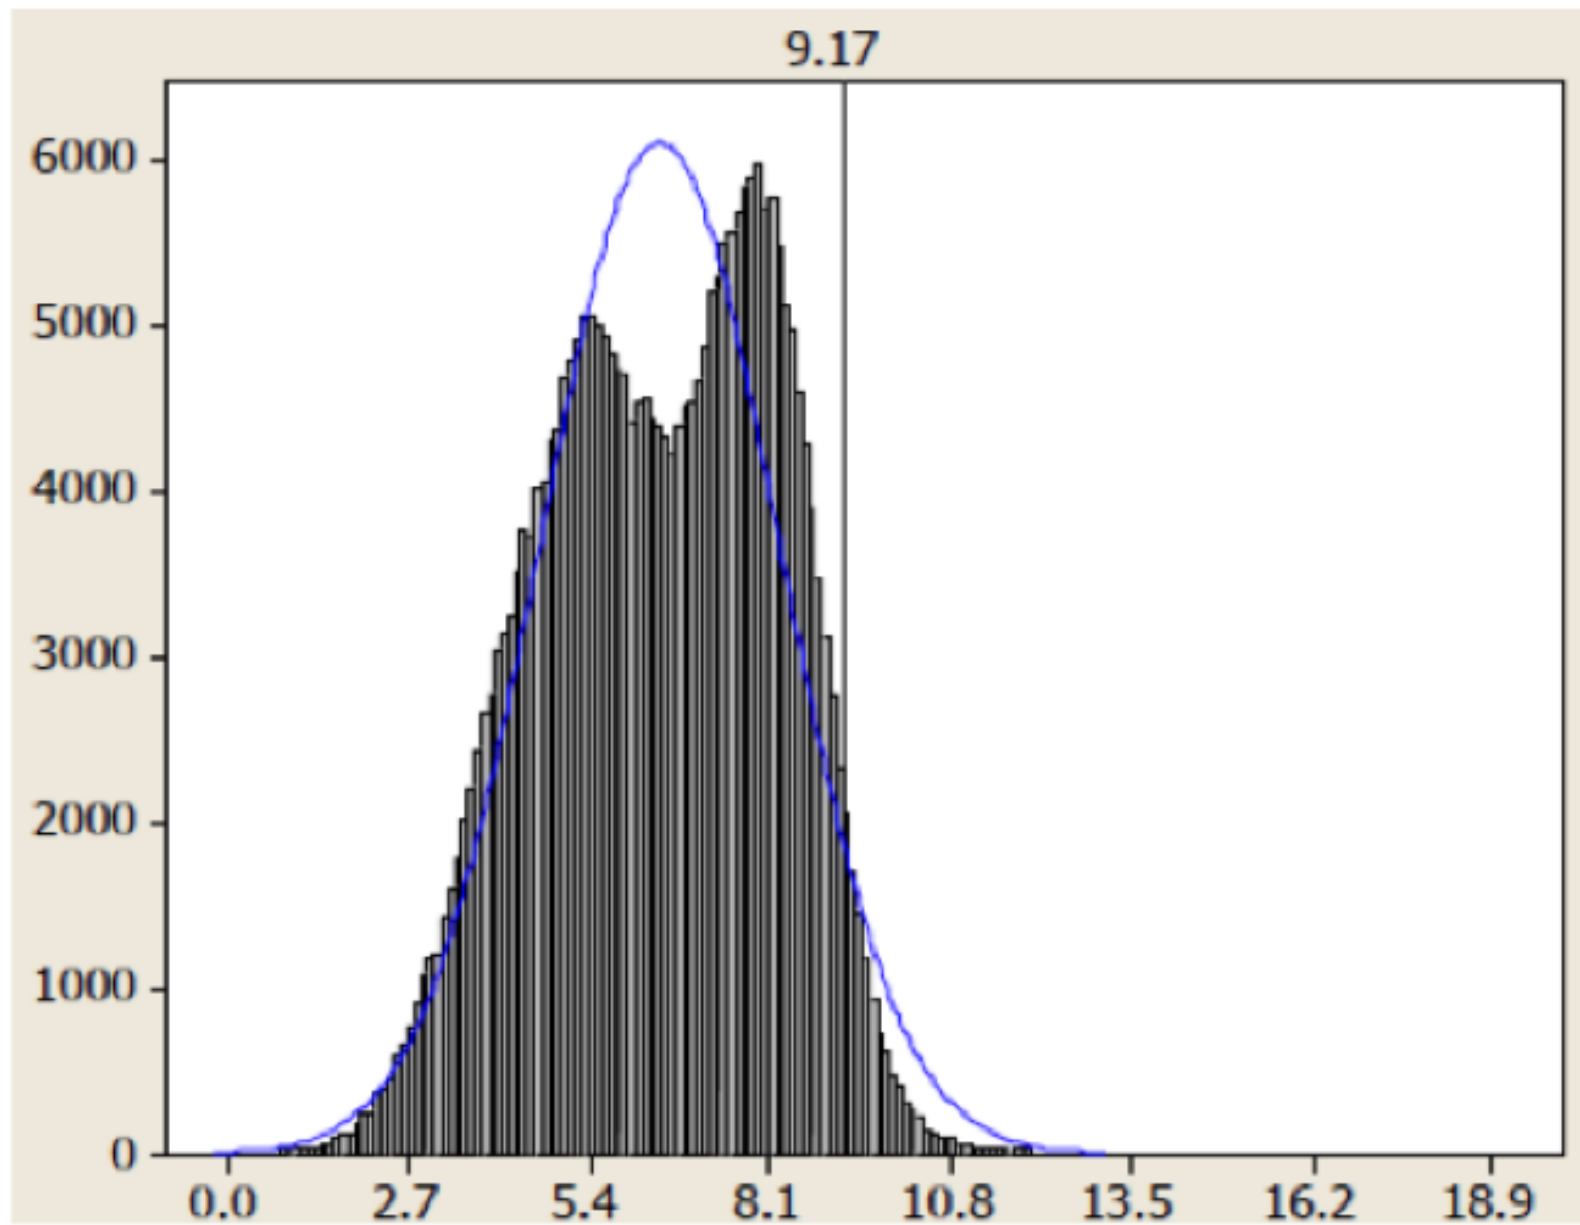

**Log2 Fluorescence**
