# Supplementary material for: A novel approach for human whole transcriptome analysis based on absolute gene expression of microarray data
Source: PeerJ journal article supplement (doi:10.7717/peerj.4133), 2017-12-08
Supplement: figure_s3.pdf [file figure_s3.pdf]

A Venn diagram with two overlapping circles. The left circle is labeled 'Barcode' and contains the text '558 (1%)'. The right circle is labeled 'Threshold' and contains the text '2828 (5%)'. The intersection of the two circles contains the text '50638 (93.7%)'.

558 (1%)

**50638**  
**(93.7%)**

Threshold

2828 (5%)
