# Supplementary material for: A novel approach for human whole transcriptome analysis based on absolute gene expression of microarray data
Source: PeerJ journal article supplement (doi:10.7717/peerj.4133), 2017-12-08
Supplement: Miame_Checklist_PeerJ_agosto_2017_AOL.pdf [file Miame_Checklist_PeerJ_agosto_2017_AOL.pdf]

## Miame Checklist

Manuscript: “A novel approach for human whole transcriptome profiling based on absolute gene expression analysis of microarray data”

Shirley Bikel, Leonor Jacobo-Albavera, Fausto Sánchez-Muñoz, Fernanda Cornejo-Granados, Samuel Canizales-Quinteros, Xavier Soberón, Rogerio R. Sotelo-Mundo, Blanca E del Río-Navarro, Alfredo Mendoza-Vargas, Filiberto Sánchez, and Adrián Ochoa-Leyva.

### **Part 1 Experiment description**

**Type of experiment:**

Absolute expression analysis of leukocytes from human samples at a single time point.

**Experimental variables:**

None.

**n-count:**

16 samples (9 males and 7 female subjects).

**tissues used for slide:**

Human blood tissue.

**other variables (wean weight, pooled samples, etc.)**

None.

### **Part 2 Array design.**

**Array series:** Affymetrix Gene Chip Human Gene 1.0 ST Array.

**Deconvoluted spot list with gene names:** <https://www.thermofisher.com/order/catalog/product/901085>

**Array type (mouse, human, cDNA, oligo, number of genes):** human; cDNA; 21,014 genes

**Array size:** 5µm.

**Slide type (and coating):** The array consists of a square glass substrate mounted in a plastic cartridge. The glass contains an array of oligonucleotides that, when mounted, is on the inner glass surface. A chamber in the plastic housing directly under the glass acts as a reservoir where hybridization and washing occur.

### **Part 3 Samples**

**Cy3/Cy5 labels for tissues:** None.

**Dye swap? Or reference control?:** None.

**Labelling protocol used:** Standard Affymetrix protocol. Performed at Affymetrix platform in the Genotyping and Expression Analysis Unit of the National Institute of Genomic Medicine (INMEGEN).

**Sample extraction protocol used:** RNA was isolated using TRIzol (Invitrogen) according to manufacturer's protocol.

**Amount of sample labeled:** Standard Affymetrix protocol. Performed at Affymetrix platform in the Genotyping and Expression Analysis Unit of the National Institute of Genomic Medicine (INMEGEN).

### **Part 4 Hybridizations**

**Hybridization protocol:** Standard Affymetrix protocol. Performed at Affymetrix platform in the Genotyping and Expression Analysis Unit of the National Institute of Genomic Medicine (INMEGEN).

**ALL modifications and deviations from the protocol:** None.

**Manual hybridization or automatic chamber:** Automatic chamber.

**Number of slides done at the same time:** 16.

**Hyb time:** 16 hours.

**Number of washes:** Standard Affymetrix protocol. Performed at Affymetrix platform in the Genotyping and Expression Analysis Unit of the National Institute of Genomic Medicine (INMEGEN).

**Amount of labelled sample hybridized:** Standard Affymetrix protocol. Performed at Affymetrix platform in the Genotyping and Expression Analysis Unit of the National Institute of Genomic Medicine (INMEGEN).

**Labelling efficiency:** Acceptable according to the standard Affymetrix protocol. Performed at Affymetrix platform in the Genotyping and Expression Analysis Unit of the National Institute of Genomic Medicine (INMEGEN).

## **Part 5 Measurements**

**Which version of scanner software used:** Affymetrix GeneChip Command Console Software (AGCC).

**Laser power for scan:** Default parameters of the Affymetrix Gene Chip Scanner 3000 7G.

**Instrument model numbers:** Model number 00-0210, Affymetrix Gene Chip Scanner 3000 7G.

**Must save original .tiff format images (composite image is optional):** These data are available on the NCBI Gene Expression Omnibus (GEO) under accession number GSE89571.

**Normalization protocol:** Robust Multi-Array (RMA).

**Does the scanner software subtract background? How much?.** Default parameters of the Affymetrix GeneChip Command Console Software (AGCC).

**Spot raw values, background intensity, ch1 and 2 intensity, etc.** Default parameters of the Affymetrix GeneChip Command Console Software (AGCC).

**Corresponding gene name.** Default parameters of the Affymetrix GeneChip Command Console Software (AGCC).

**Methods of analysis (MAN, Spotfire, Genespring) be detailed.** Default parameters of the Affymetrix GeneChip Command Console Software (AGCC).

**Normalized to controls? Controls removed? All normalization parameters.** Normalization was made using the Robust Multi-Array (RMA) under default parameters in RMA Express software.

**Name of Images, Experiment, and location of files.** These data are available on the NCBI Gene Expression Omnibus (GEO) under accession number GSE89571.

**Lowess or other normalization if used (and parameters).** Normalization was made using the Robust Multi-Array (RMA) under default parameters in RMA Express software.

**Output file:** None.

**Normalized ratios:** None.

**Numerical manipulations:** None.

**Cut off values:** None.

## **Part 6 Normalization controls**

**Hypothesis:** The normalized fluorescence values were used to develop an absolute gene expression method for microarray analysis.

**Gene expression patterns found:** None.

**Controls used, normalization methods used (see above):** Normalization was made using the Robust Multi-Array (RMA) under default parameters in RMA Express software.
