# Supplementary material for: A novel approach for human whole transcriptome analysis based on absolute gene expression of microarray data
Source: PeerJ journal article supplement (doi:10.7717/peerj.4133), 2017-12-08
Supplement: S1_Table.pdf [file S1_Table.pdf]

| <b>Gene</b>    | <b>Primer</b> | <b>Sequence (5' -&gt; 3')</b> | <b>Amplicon Length</b> |
|----------------|---------------|-------------------------------|------------------------|
| <b>DDX3Y</b>   | Fwd           | AGGACGTGTAGGAAACCTGG          | 111 bp                 |
|                | Rev           | GAAGGCACTTCTTGTGTTAGCTTC      |                        |
| <b>EIF1AY</b>  | Fwd           | ACAATGCAGATGAAGCTAGAAGC       | 100 bp                 |
|                | Rev           | TCATCATCATCTCCAGGACCAA        |                        |
| <b>TXLNG2P</b> | Fwd           | AAAGAACAGGAGTTGGGTGAGC        | 100 bp                 |
|                | Rev           | TAAAGCTTGCTGACCAGACGG         |                        |
| <b>TXNIP</b>   | Fwd           | AGTAGTGGATCTGGTGGATGTC        | 100 bp                 |
|                | Rev           | CCGCCATCAGGAATGAACA           |                        |
| <b>B2M</b>     | Fwd           | GAGATGTCTCGCTCCGTGG           | 111 bp                 |
|                | Rev           | CTCTGCTGGATGACGTGAGT          |                        |
| <b>PYHIN1</b>  | Fwd           | CACTGGGAGACCTTGCTGAA          | 110 bp                 |
|                | Rev           | GCATGCAGGTGTAGCAGGAT          |                        |
| <b>ZZZ3</b>    | Fwd           | GGCACCAGAGAGAAGCACTG          | 120 bp                 |
|                | Rev           | GGTCCCATACGATCTCAGGC          |                        |
| <b>BEND7</b>   | Fwd           | CCTGGTGAAGCTGACAGACA          | 118 bp                 |
|                | Rev           | TCCTTCTTTGCCAACTCGCT          |                        |
| <b>CAPN11</b>  | Fwd           | CAAGAGCTACTGGCACACCA          | 107 bp                 |
|                | Rev           | TAAACTGGGGGTTGGTCCAG          |                        |
| <b>ZNF99</b>   | Fwd           | GCAATGCCTGGACATGGCT           | 103 bp                 |
|                | Rev           | CAAGTCTAGCTTAGAGACAGCGA       |                        |
| <b>ABCA6</b>   | Fwd           | AAAGCGTGTATCAGCAAACCA         | 100 bp                 |
|                | Rev           | AGTATTGAGAGGCCCCATTCC         |                        |
| <b>UBE2U</b>   | Fwd           | ACTATGCTCCTCCAGTTGTGA         | 107 bp                 |
|                | Rev           | CCACTTCTCAGGGTTGTCCA          |                        |
| <b>C3ORF30</b> | Fwd           | CCCAAGACTCCCCTCCATCT          | 113 bp                 |
|                | Rev           | AACCCTTTCCTTGGTCAATTTCTG      |                        |
