# Supplementary material for: A novel approach for human whole transcriptome analysis based on absolute gene expression of microarray data
Source: PeerJ journal article supplement (doi:10.7717/peerj.4133), 2017-12-08
Supplement: S2_Table.pdf [file S2_Table.pdf]

|    | Gene Name | Probesets | NI0627.CEL | VE9-0291.CEL | VE9-0336.CEL | VE9-0432.CEL | VE9-0472.CEL | VE9-0515.CEL | VE9-0567.CEL | VE9-0687.CEL | VE9-0817.CEL | VE9-1036.CEL | VE9-1050.CEL | VE9-0697.CEL | VE9-0739.CEL | VE9-0748.CEL | VE9-0307.CEL | VE9-0039.CEL |
|----|-----------|-----------|------------|--------------|--------------|--------------|--------------|--------------|--------------|--------------|--------------|--------------|--------------|--------------|--------------|--------------|--------------|--------------|
| 1  | AKAP17A   | 8176342   | 6.03       | 6.15         | 6.11         | 5.93         | 5.88         | 6.00         | 6.22         | 6.42         | 6.16         | 6.14         | 6.22         | 6.06         | 6.09         | 5.98         | 6.06         | 6.16         |
| 2  | AMELY     | 8177061   | 4.30       | 4.11         | 4.10         | 4.23         | 4.22         | 3.98         | 4.13         | 3.86         | 4.55         | 4.14         | 4.01         | 4.20         | 4.21         | 4.04         | 4.38         | 4.09         |
| 3  | ANKRD36P1 | 8176951   | 3.78       | 4.13         | 4.27         | 4.40         | 4.14         | 4.34         | 4.06         | 4.04         | 4.38         | 4.10         | 3.94         | 4.23         | 4.25         | 4.40         | 4.26         | 4.29         |
| 4  | ASMTL     | 8177011   | 6.06       | 6.52         | 6.35         | 6.35         | 6.51         | 6.27         | 6.48         | 6.58         | 6.47         | 5.81         | 5.96         | 6.24         | 6.26         | 6.24         | 6.61         | 6.10         |
| 5  | ASMTL-AS1 | 8176336   | 5.65       | 5.82         | 5.99         | 5.89         | 5.46         | 5.53         | 5.91         | 5.88         | 6.25         | 5.55         | 5.70         | 5.49         | 5.91         | 5.69         | 6.05         | 6.05         |
| 6  | BCORP1    | 8177229   | 3.82       | 6.04         | 5.27         | 5.01         | 5.17         | 5.03         | 4.83         | 5.60         | 4.83         | 3.04         | 3.69         | 3.42         | 3.38         | 3.56         | 2.82         | 2.90         |
| 7  | BPY2      | 8176821   | 5.92       | 4.11         | 4.17         | 3.92         | 3.93         | 3.93         | 3.94         | 3.72         | 4.45         | 4.18         | 3.79         | 3.62         | 3.87         | 3.82         | 4.06         | 3.90         |
|    |           | 8176867   | 5.92       | 4.11         | 4.17         | 3.92         | 3.93         | 3.93         | 3.94         | 3.72         | 4.45         | 4.18         | 3.79         | 3.62         | 3.87         | 3.82         | 4.06         | 3.90         |
|    |           | 8177449   | 5.92       | 4.11         | 4.17         | 3.92         | 3.93         | 3.93         | 3.94         | 3.72         | 4.45         | 4.18         | 3.79         | 3.62         | 3.87         | 3.82         | 4.06         | 3.90         |
| 8  | CD24      | 8177222   | 4.82       | 6.32         | 5.52         | 6.16         | 6.28         | 5.85         | 5.98         | 6.32         | 4.62         | 5.09         | 5.98         | 4.78         | 5.71         | 5.81         | 5.30         | 5.49         |
| 9  | CD99      | 8176360   | 9.09       | 9.45         | 9.17         | 9.36         | 9.62         | 9.71         | 9.16         | 9.42         | 8.83         | 8.45         | 8.73         | 9.04         | 9.03         | 8.68         | 9.42         | 8.68         |
| 10 | CDY1      | 8177186   | 4.03       | 3.37         | 3.72         | 3.48         | 3.71         | 3.61         | 3.84         | 3.57         | 3.86         | 3.42         | 3.64         | 3.97         | 3.81         | 3.67         | 3.91         | 3.66         |
|    |           | 8176671   | 4.22       | 3.50         | 3.87         | 3.57         | 3.84         | 3.72         | 3.97         | 3.69         | 4.01         | 3.56         | 3.77         | 4.06         | 3.96         | 3.77         | 4.03         | 3.78         |
| 11 | CDY2A     | 8177405   | 4.18       | 3.49         | 3.70         | 3.50         | 3.75         | 3.58         | 3.78         | 3.67         | 4.04         | 3.52         | 3.74         | 3.98         | 3.87         | 3.62         | 3.91         | 3.64         |
|    |           | 8176926   | 4.18       | 3.49         | 3.70         | 3.50         | 3.75         | 3.58         | 3.78         | 3.67         | 4.04         | 3.52         | 3.74         | 3.98         | 3.87         | 3.62         | 3.91         | 3.64         |
| 12 | CSF2RA    | 8176306   | 7.59       | 7.42         | 7.25         | 7.58         | 7.86         | 8.32         | 8.13         | 8.34         | 7.67         | 7.41         | 8.19         | 7.78         | 8.01         | 7.98         | 8.03         | 7.28         |
| 13 | CSPG4P1Y  | 8176923   | 5.52       | 4.62         | 5.22         | 4.84         | 4.93         | 4.89         | 4.53         | 4.62         | 5.71         | 4.73         | 4.67         | 4.59         | 4.90         | 4.99         | 4.99         | 4.61         |
|    |           | 8177410   | 5.52       | 4.62         | 5.22         | 4.84         | 4.93         | 4.89         | 4.53         | 4.62         | 5.71         | 4.73         | 4.67         | 4.59         | 4.90         | 4.99         | 4.99         | 4.61         |
| 14 | CYorf17   | 8177273   | 5.29       | 5.29         | 5.20         | 5.04         | 5.12         | 5.07         | 4.91         | 5.06         | 6.06         | 4.90         | 4.86         | 4.57         | 5.22         | 4.87         | 5.06         | 4.91         |
| 15 | DAZ4      | 8177354   | 5.25       | 3.87         | 4.00         | 3.78         | 3.86         | 3.80         | 3.97         | 3.75         | 4.46         | 3.71         | 3.91         | 3.58         | 3.92         | 3.89         | 3.83         | 3.50         |
|    |           | 8176832   | 5.25       | 3.87         | 4.00         | 3.78         | 3.86         | 3.80         | 3.97         | 3.75         | 4.46         | 3.71         | 3.91         | 3.58         | 3.92         | 3.89         | 3.83         | 3.50         |
|    |           | 8176878   | 5.25       | 3.87         | 4.00         | 3.78         | 3.86         | 3.80         | 3.97         | 3.75         | 4.46         | 3.71         | 3.91         | 3.58         | 3.92         | 3.89         | 3.83         | 3.50         |
|    |           | 8177426   | 5.26       | 3.93         | 4.09         | 3.87         | 3.95         | 3.89         | 4.05         | 3.80         | 4.53         | 3.80         | 3.99         | 3.69         | 4.02         | 4.00         | 3.88         | 3.55         |
| 16 | DDX3Y     | 8176624   | 8.81       | 9.19         | 9.10         | 9.44         | 9.27         | 9.51         | 9.16         | 9.46         | 8.09         | 4.21         | 4.13         | 4.24         | 4.15         | 4.30         | 3.99         | 4.45         |
| 17 | DUX4L7    | 8176570   | 8.29       | 6.67         | 6.80         | 6.50         | 6.19         | 6.50         | 5.94         | 6.00         | 7.30         | 7.47         | 6.84         | 6.20         | 6.88         | 6.24         | 5.51         | 6.50         |
| 18 | EIF1AY    | 8176719   | 7.65       | 8.51         | 8.39         | 8.63         | 8.40         | 9.19         | 8.79         | 9.14         | 7.86         | 2.83         | 3.14         | 3.46         | 3.37         | 3.11         | 3.25         | 2.93         |
| 19 | EIF4A1P2  | 8177046   | 4.85       | 5.68         | 5.14         | 5.31         | 5.16         | 5.60         | 5.56         | 5.42         | 5.04         | 5.04         | 5.30         | 5.06         | 5.31         | 4.56         | 4.54         | 4.11         |
| 20 | ERVH-6    | 8177269   | 4.75       | 4.52         | 3.78         | 4.48         | 4.33         | 4.28         | 4.17         | 3.79         | 4.39         | 3.95         | 3.64         | 3.47         | 3.61         | 3.69         | 4.09         | 3.45         |
| 21 | FLJ20518  | 8176572   | 7.82       | 5.69         | 5.31         | 5.26         | 4.67         | 5.01         | 5.38         | 5.25         | 5.99         | 6.62         | 5.85         | 5.39         | 6.29         | 5.24         | 5.32         | 5.34         |
| 22 | GOLGA2P2Y | 8177413   | 6.70       | 5.91         | 6.07         | 5.78         | 5.91         | 5.69         | 6.07         | 5.72         | 6.50         | 5.84         | 6.20         | 5.76         | 5.92         | 6.11         | 5.94         | 5.84         |
|    |           | 8176910   | 6.70       | 5.91         | 6.07         | 5.78         | 5.91         | 5.69         | 6.07         | 5.72         | 6.50         | 5.84         | 6.20         | 5.76         | 5.92         | 6.11         | 5.94         | 5.84         |
| 23 | HSFY2     | 8177201   | 2.97       | 3.03         | 3.16         | 2.84         | 2.91         | 2.86         | 3.21         | 2.86         | 3.25         | 3.19         | 3.19         | 2.96         | 2.95         | 3.11         | 3.23         | 3.13         |
|    |           | 8176681   | 2.97       | 3.03         | 3.16         | 2.84         | 2.91         | 2.86         | 3.21         | 2.86         | 3.25         | 3.19         | 3.19         | 2.96         | 2.95         | 3.11         | 3.23         | 3.13         |
| 24 | IL3RA     | 8176323   | 5.27       | 5.98         | 5.76         | 5.76         | 6.01         | 6.10         | 6.15         | 6.06         | 5.63         | 5.29         | 5.42         | 6.03         | 5.76         | 5.63         | 6.60         | 5.71         |
| 25 | IL9R      | 8176972   | 6.42       | 5.93         | 6.29         | 5.96         | 6.05         | 6.03         | 5.95         | 5.87         | 6.61         | 6.23         | 6.01         | 5.84         | 6.05         | 5.96         | 6.00         | 5.78         |
| 26 | KDM5D     | 8177232   | 8.11       | 8.55         | 8.20         | 8.25         | 8.25         | 8.30         | 8.05         | 8.22         | 7.35         | 4.47         | 4.57         | 4.15         | 4.57         | 4.46         | 4.51         | 4.35         |
| 27 | MAFIP     | 8177120   | 6.77       | 5.38         | 5.85         | 6.18         | 5.60         | 5.41         | 5.19         | 5.72         | 6.01         | 6.12         | 5.08         | 5.86         | 5.22         | 5.31         | 5.31         | 5.48         |
| 28 | MXRA5P1   | 8176574   | 4.62       | 4.09         | 4.48         | 4.34         | 4.26         | 4.50         | 4.37         | 4.06         | 5.34         | 4.27         | 3.81         | 4.18         | 4.29         | 3.86         | 3.94         | 4.48         |
| 29 | NLGN4Y    | 8176655   | 4.97       | 4.82         | 5.13         | 4.64         | 4.57         | 4.84         | 4.78         | 4.72         | 5.24         | 4.90         | 4.58         | 4.17         | 4.62         | 4.32         | 4.37         | 4.58         |
| 30 | OFD1PSY   | 8177195   | 3.71       | 3.68         | 3.87         | 3.52         | 3.67         | 3.36         | 3.51         | 3.45         | 4.13         | 3.63         | 3.61         | 3.35         | 3.91         | 3.69         | 3.66         | 3.67         |
|    |           | 8176692   | 3.71       | 3.68         | 3.87         | 3.52         | 3.67         | 3.36         | 3.51         | 3.45         | 4.13         | 3.63         | 3.61         | 3.35         | 3.91         | 3.69         | 3.66         | 3.67         |

|    | Gene Name | Probesets | NI0627.CEL | VE9-0291.CEL | VE9-0336.CEL | VE9-0432.CEL | VE9-0472.CEL | VE9-0515.CEL | VE9-0567.CEL | VE9-0687.CEL | VE9-0817.CEL | VE9-1036.CEL | VE9-1050.CEL | VE9-0697.CEL | VE9-0739.CEL | VE9-0748.CEL | VE9-0307.CEL | VE9-0039.CEL |
|----|-----------|-----------|------------|--------------|--------------|--------------|--------------|--------------|--------------|--------------|--------------|--------------|--------------|--------------|--------------|--------------|--------------|--------------|
| 31 | P2RY8     | 8177026   | 8.49       | 8.89         | 8.92         | 9.09         | 8.98         | 8.74         | 8.49         | 8.66         | 8.40         | 8.67         | 8.50         | 8.84         | 8.55         | 8.61         | 8.98         | 8.84         |
| 32 | PCDH11Y   | 8176400   | 3.96       | 3.74         | 4.01         | 3.86         | 3.88         | 3.76         | 3.75         | 3.71         | 4.41         | 4.13         | 3.74         | 3.73         | 3.90         | 3.57         | 3.94         | 3.79         |
| 33 | PCMTD2    | 8177460   | 6.59       | 7.25         | 6.61         | 7.58         | 7.05         | 7.56         | 7.50         | 7.66         | 5.25         | 6.75         | 8.26         | 7.27         | 7.67         | 7.73         | 7.16         | 7.23         |
|    |           | 8176865   | 6.59       | 7.25         | 6.61         | 7.58         | 7.05         | 7.56         | 7.50         | 7.66         | 5.25         | 6.75         | 8.26         | 7.27         | 7.67         | 7.73         | 7.16         | 7.23         |
| 34 | PLCXD1    | 8176286   | 6.29       | 6.69         | 6.79         | 6.82         | 7.04         | 6.49         | 6.74         | 6.88         | 6.98         | 6.30         | 6.49         | 6.05         | 6.57         | 6.89         | 6.72         | 6.10         |
| 35 | PRKY      | 8176460   | 6.96       | 7.55         | 6.90         | 7.49         | 7.16         | 7.18         | 7.22         | 7.42         | 7.01         | 5.40         | 5.41         | 5.41         | 5.45         | 5.51         | 5.17         | 5.61         |
| 36 | PRY       | 8176806   | 5.47       | 4.70         | 5.08         | 4.84         | 4.81         | 4.75         | 4.84         | 4.71         | 5.51         | 4.72         | 4.78         | 4.53         | 4.90         | 4.71         | 4.81         | 4.67         |
|    |           | 8177323   | 5.45       | 4.67         | 5.05         | 4.84         | 4.78         | 4.75         | 4.81         | 4.74         | 5.51         | 4.76         | 4.76         | 4.50         | 4.87         | 4.74         | 4.84         | 4.66         |
|    |           | 8176935   | 5.51       | 4.71         | 5.01         | 4.83         | 4.89         | 4.77         | 4.92         | 4.80         | 5.64         | 4.85         | 4.82         | 4.53         | 4.86         | 4.80         | 4.98         | 4.76         |
|    |           | 8177395   | 5.51       | 4.71         | 5.01         | 4.83         | 4.89         | 4.77         | 4.92         | 4.80         | 5.64         | 4.85         | 4.82         | 4.53         | 4.86         | 4.80         | 4.98         | 4.76         |
| 37 | RBM1A3P   | 8177096   | 4.86       | 3.38         | 3.84         | 3.74         | 3.81         | 3.75         | 3.71         | 3.72         | 4.30         | 3.69         | 3.84         | 3.84         | 3.60         | 3.78         | 3.90         | 3.83         |
| 38 | RBM1B     | 8176742   | 4.29       | 2.94         | 3.19         | 3.06         | 3.08         | 3.16         | 2.98         | 2.87         | 3.69         | 2.98         | 3.00         | 2.98         | 3.17         | 3.24         | 3.07         | 3.11         |
|    |           | 8177277   | 7.33       | 2.19         | 2.12         | 2.83         | 2.97         | 2.40         | 2.69         | 2.57         | 2.88         | 2.29         | 3.19         | 2.72         | 2.32         | 2.92         | 3.42         | 2.96         |
| 39 | RBM1F     | 8176753   | 4.50       | 3.03         | 3.36         | 3.16         | 3.18         | 3.15         | 3.17         | 2.99         | 3.75         | 3.07         | 3.15         | 3.01         | 3.20         | 3.31         | 3.22         | 3.27         |
|    |           | 8177290   | 4.50       | 3.03         | 3.36         | 3.16         | 3.18         | 3.15         | 3.17         | 2.99         | 3.75         | 3.07         | 3.15         | 3.01         | 3.20         | 3.31         | 3.22         | 3.27         |
|    |           | 8176766   | 4.50       | 3.05         | 3.35         | 3.16         | 3.19         | 3.17         | 3.15         | 3.01         | 3.76         | 3.05         | 3.12         | 3.05         | 3.24         | 3.32         | 3.25         | 3.22         |
|    |           | 8176789   | 4.21       | 2.99         | 3.36         | 3.16         | 3.19         | 3.12         | 3.11         | 3.04         | 3.75         | 3.06         | 3.11         | 3.02         | 3.30         | 3.26         | 3.28         | 3.10         |
|    |           | 8177331   | 4.45       | 3.02         | 3.36         | 3.18         | 3.19         | 3.19         | 3.15         | 3.01         | 3.81         | 3.08         | 3.11         | 3.05         | 3.27         | 3.34         | 3.28         | 3.20         |
| 40 | RBM2AP    | 8177389   | 3.80       | 3.25         | 3.20         | 3.18         | 3.22         | 3.13         | 3.42         | 3.32         | 3.81         | 3.49         | 3.28         | 3.26         | 3.13         | 3.50         | 3.32         | 3.38         |
|    |           | 8176817   | 3.80       | 3.25         | 3.20         | 3.18         | 3.22         | 3.13         | 3.42         | 3.32         | 3.81         | 3.49         | 3.28         | 3.26         | 3.13         | 3.50         | 3.32         | 3.38         |
|    |           | 8176943   | 3.80       | 3.25         | 3.20         | 3.18         | 3.22         | 3.13         | 3.42         | 3.32         | 3.81         | 3.49         | 3.28         | 3.26         | 3.13         | 3.50         | 3.32         | 3.38         |
|    |           | 8176941   | 3.48       | 2.80         | 3.39         | 3.24         | 3.23         | 3.00         | 3.06         | 3.01         | 4.06         | 3.25         | 3.10         | 3.05         | 2.90         | 3.71         | 3.09         | 2.95         |
|    |           | 8176815   | 3.48       | 2.80         | 3.39         | 3.24         | 3.23         | 3.00         | 3.06         | 3.01         | 4.06         | 3.25         | 3.10         | 3.05         | 2.90         | 3.71         | 3.09         | 2.95         |
|    |           | 8177393   | 3.48       | 2.80         | 3.39         | 3.24         | 3.23         | 3.00         | 3.06         | 3.01         | 4.06         | 3.25         | 3.10         | 3.05         | 2.90         | 3.71         | 3.09         | 2.95         |
| 41 | RBM2NP    | 8177114   | 4.26       | 4.44         | 4.69         | 4.94         | 5.31         | 4.85         | 4.55         | 4.64         | 5.32         | 4.55         | 5.05         | 4.77         | 4.85         | 4.86         | 5.18         | 4.69         |
|    |           | 8176427   | 4.26       | 4.44         | 4.69         | 4.94         | 5.31         | 4.85         | 4.55         | 4.64         | 5.32         | 4.55         | 5.05         | 4.77         | 4.85         | 4.86         | 5.18         | 4.69         |
| 42 | RBM2TP    | 8177280   | 3.44       | 3.29         | 3.87         | 3.89         | 3.65         | 3.65         | 3.79         | 3.59         | 4.40         | 4.44         | 4.17         | 3.86         | 3.61         | 3.61         | 4.03         | 4.12         |
| 43 | RFTN1     | 8177072   | 4.52       | 4.44         | 4.49         | 4.27         | 4.35         | 4.26         | 4.21         | 4.08         | 4.56         | 4.25         | 4.16         | 4.40         | 4.38         | 4.52         | 4.41         | 4.20         |
| 44 | RN5-8S6   | 8176568   | 5.00       | 5.40         | 4.88         | 5.30         | 5.33         | 5.05         | 5.24         | 5.31         | 5.11         | 5.16         | 5.50         | 5.00         | 5.39         | 5.39         | 4.84         | 5.54         |
| 45 | RN5S518   | 8177116   | 4.91       | 4.97         | 5.59         | 4.86         | 4.80         | 4.72         | 4.64         | 4.72         | 5.64         | 5.86         | 5.00         | 4.80         | 4.81         | 4.93         | 5.04         | 5.19         |
| 46 | RN5S519   | 8177118   | 5.82       | 5.31         | 5.88         | 5.28         | 5.28         | 5.48         | 4.92         | 4.77         | 6.26         | 5.81         | 5.41         | 5.35         | 5.61         | 4.65         | 5.37         | 5.25         |
| 47 | RN5S520   | 8176667   | 6.46       | 5.91         | 6.16         | 6.12         | 6.10         | 5.83         | 5.94         | 5.83         | 6.91         | 6.15         | 6.45         | 5.54         | 6.41         | 6.00         | 6.05         | 6.11         |
|    |           | 8177191   | 6.46       | 5.91         | 6.16         | 6.12         | 6.10         | 5.83         | 5.94         | 5.83         | 6.91         | 6.15         | 6.45         | 5.54         | 6.41         | 6.00         | 6.05         | 6.11         |
| 48 | RN5S521   | 8177189   | 6.24       | 5.26         | 6.13         | 5.32         | 5.66         | 5.57         | 5.70         | 5.54         | 6.75         | 5.49         | 5.77         | 5.72         | 5.62         | 5.53         | 5.70         | 5.81         |
|    |           | 8176669   | 6.24       | 5.26         | 6.13         | 5.32         | 5.66         | 5.57         | 5.70         | 5.54         | 6.75         | 5.49         | 5.77         | 5.72         | 5.62         | 5.53         | 5.70         | 5.81         |
| 49 | RPS4Y1    | 8176375   | 8.62       | 8.65         | 8.20         | 8.51         | 8.98         | 8.79         | 8.20         | 8.75         | 7.10         | 4.19         | 3.94         | 3.91         | 3.55         | 3.58         | 3.90         | 3.78         |
| 50 | RPS4Y2    | 8176730   | 5.05       | 5.04         | 4.87         | 5.20         | 5.39         | 4.91         | 5.29         | 5.53         | 4.88         | 4.38         | 3.79         | 3.64         | 4.09         | 4.03         | 4.08         | 3.96         |
| 51 | SHOX      | 8176297   | 4.87       | 4.80         | 5.11         | 4.87         | 4.90         | 4.83         | 4.94         | 4.60         | 5.61         | 5.42         | 5.01         | 4.56         | 5.04         | 4.87         | 5.04         | 5.21         |
| 52 | SLC25A6   | 8177003   | 9.76       | 10.00        | 10.08        | 10.03        | 10.27        | 10.06        | 9.77         | 9.96         | 9.37         | 10.22        | 9.35         | 9.63         | 9.69         | 9.61         | 10.13        | 9.77         |
| 53 | SLC9B1    | 8177130   | 4.76       | 4.63         | 4.95         | 4.93         | 4.44         | 4.49         | 3.97         | 5.07         | 3.88         | 4.48         | 4.01         | 3.95         | 4.58         | 4.77         | 4.55         | 3.93         |
| 54 | SPRY3     | 8176955   | 4.23       | 4.15         | 4.45         | 4.40         | 4.41         | 4.51         | 4.45         | 4.51         | 4.63         | 4.39         | 4.74         | 5.02         | 4.45         | 4.14         | 4.46         | 4.54         |
| 55 | SRY       | 8177038   | 3.30       | 3.55         | 3.62         | 3.36         | 3.53         | 3.49         | 3.36         | 3.07         | 3.77         | 3.28         | 3.20         | 3.13         | 3.24         | 3.11         | 3.66         | 3.68         |
| 56 | TBL1Y     | 8176442   | 5.06       | 4.83         | 4.89         | 4.74         | 4.91         | 4.74         | 4.81         | 4.67         | 5.07         | 4.75         | 4.85         | 4.78         | 4.99         | 4.61         | 4.84         | 4.99         |
| 57 | TGIF2LY   | 8176397   | 3.77       | 3.77         | 4.06         | 3.75         | 3.53         | 3.68         | 3.67         | 3.66         | 4.22         | 4.43         | 3.79         | 3.92         | 3.71         | 3.69         | 3.94         | 3.67         |
| 58 | TMSB4Y    | 8176644   | 5.82       | 6.05         | 6.12         | 5.70         | 5.78         | 6.16         | 5.80         | 5.63         | 6.17         | 5.52         | 5.63         | 5.45         | 5.76         | 5.55         | 5.48         | 5.51         |
| 59 | TSPY1     | 8176494   | 6.04       | 4.82         | 4.90         | 4.96         | 4.86         | 4.76         | 4.92         | 4.73         | 5.24         | 4.88         | 4.84         | 4.77         | 4.84         | 4.97         | 4.85         | 4.72         |
|    |           | 8176544   | 6.11       | 4.88         | 4.95         | 5.03         | 4.94         | 4.84         | 5.00         | 4.79         | 5.29         | 4.99         | 4.94         | 4.83         | 4.91         | 5.06         | 4.92         | 4.77         |
|    |           | 8176508   | 6.11       | 4.85         | 4.92         | 4.99         | 4.91         | 4.81         | 4.97         | 4.77         | 5.27         | 4.95         | 4.91         | 4.80         | 4.88         | 5.03         | 4.90         | 4.76         |
| 60 | TSPY14P   | 8176737   | 3.88       | 3.70         | 3.87         | 3.59         | 3.47         | 3.66         | 3.55         | 4.08         | 4.55         | 3.64         | 3.86         | 3.73         | 3.74         | 3.87         | 4.13         | 3.55         |

|    | Gene Name | Probesets | NI0627.CEL | VE9-0291.CEL | VE9-0336.CEL | VE9-0432.CEL | VE9-0472.CEL | VE9-0515.CEL | VE9-0567.CEL | VE9-0687.CEL | VE9-0817.CEL | VE9-1036.CEL | VE9-1050.CEL | VE9-0697.CEL | VE9-0739.CEL | VE9-0748.CEL | VE9-0307.CEL | VE9-0039.CEL |
|----|-----------|-----------|------------|--------------|--------------|--------------|--------------|--------------|--------------|--------------|--------------|--------------|--------------|--------------|--------------|--------------|--------------|--------------|
| 61 | TSPY3     | 8176517   | 6.14       | 5.07         | 5.18         | 5.25         | 5.11         | 5.04         | 5.18         | 4.99         | 5.53         | 5.16         | 5.10         | 4.98         | 5.13         | 5.19         | 5.07         | 4.94         |
|    |           | 8176524   | 6.11       | 4.88         | 4.96         | 5.06         | 4.95         | 4.84         | 5.01         | 4.81         | 5.29         | 5.01         | 4.95         | 4.82         | 4.92         | 5.04         | 4.91         | 4.80         |
| 62 | TSPY4     | 8176484   | 6.11       | 4.87         | 4.91         | 4.98         | 4.90         | 4.81         | 4.97         | 4.79         | 5.29         | 4.98         | 4.88         | 4.81         | 4.86         | 5.01         | 4.92         | 4.78         |
|    |           | 8176532   | 6.11       | 4.77         | 4.81         | 4.90         | 4.80         | 4.71         | 4.87         | 4.68         | 5.15         | 4.86         | 4.83         | 4.72         | 4.77         | 4.95         | 4.82         | 4.68         |
| 63 | TTTY1     | 8177108   | 4.25       | 4.14         | 4.40         | 4.23         | 3.99         | 3.88         | 3.99         | 4.05         | 4.79         | 4.72         | 4.23         | 4.15         | 4.07         | 4.28         | 4.54         | 4.36         |
|    |           | 8176429   | 4.25       | 4.14         | 4.40         | 4.23         | 3.99         | 3.88         | 3.99         | 4.05         | 4.79         | 4.72         | 4.23         | 4.15         | 4.07         | 4.28         | 4.54         | 4.36         |
| 64 | TTTY10    | 8177261   | 5.15       | 5.33         | 5.52         | 5.30         | 5.20         | 5.65         | 5.48         | 5.31         | 5.89         | 4.23         | 3.78         | 4.00         | 4.40         | 4.16         | 4.21         | 4.03         |
| 65 | TTTY11    | 8177085   | 3.39       | 3.55         | 3.59         | 3.59         | 3.55         | 3.53         | 3.56         | 3.59         | 3.87         | 3.32         | 3.48         | 3.46         | 3.58         | 3.58         | 3.67         | 3.44         |
| 66 | TTTY12    | 8176471   | 4.71       | 3.86         | 4.10         | 3.40         | 4.08         | 3.72         | 3.79         | 3.56         | 4.45         | 3.49         | 3.58         | 3.74         | 4.01         | 3.77         | 4.03         | 3.64         |
| 67 | TTTY13    | 8177282   | 5.22       | 4.52         | 4.76         | 4.62         | 4.81         | 4.38         | 4.57         | 4.40         | 5.57         | 4.58         | 4.88         | 4.83         | 4.79         | 4.82         | 4.54         | 4.63         |
| 68 | TTTY14    | 8177214   | 3.76       | 3.89         | 3.89         | 3.33         | 3.47         | 3.70         | 3.54         | 3.66         | 3.43         | 3.43         | 3.14         | 3.24         | 3.32         | 3.20         | 3.43         | 3.21         |
|    |           | 8177217   | 6.21       | 6.61         | 6.70         | 6.42         | 6.66         | 6.18         | 6.52         | 6.57         | 7.26         | 6.95         | 6.53         | 6.35         | 6.46         | 6.23         | 6.38         | 6.51         |
| 69 | TTTY2     | 8177053   | 4.48       | 3.76         | 4.02         | 3.66         | 3.62         | 3.69         | 3.68         | 3.76         | 4.37         | 4.09         | 3.67         | 3.65         | 3.78         | 3.74         | 3.94         | 3.91         |
|    |           | 8176558   | 4.48       | 3.76         | 4.02         | 3.66         | 3.62         | 3.69         | 3.68         | 3.76         | 4.37         | 4.09         | 3.67         | 3.65         | 3.78         | 3.74         | 3.94         | 3.91         |
| 70 | TTTY5     | 8177344   | 5.37       | 5.01         | 5.25         | 4.72         | 5.08         | 4.92         | 4.98         | 4.79         | 5.57         | 5.07         | 5.14         | 4.92         | 5.26         | 4.98         | 5.37         | 5.14         |
| 71 | TTTY6B    | 8176782   | 4.97       | 4.47         | 4.52         | 4.52         | 4.52         | 4.32         | 4.33         | 4.12         | 4.87         | 4.61         | 4.34         | 4.09         | 4.27         | 4.68         | 4.68         | 4.11         |
|    |           | 8177347   | 4.97       | 4.47         | 4.52         | 4.52         | 4.52         | 4.32         | 4.33         | 4.12         | 4.87         | 4.61         | 4.34         | 4.09         | 4.27         | 4.68         | 4.68         | 4.11         |
| 72 | TTTY7     | 8177101   | 4.91       | 4.69         | 4.65         | 4.28         | 4.28         | 4.50         | 4.58         | 4.19         | 5.33         | 4.79         | 4.43         | 4.27         | 4.53         | 4.87         | 5.10         | 4.84         |
|    |           | 8176435   | 4.91       | 4.69         | 4.65         | 4.28         | 4.28         | 4.50         | 4.58         | 4.19         | 5.33         | 4.79         | 4.43         | 4.27         | 4.53         | 4.87         | 5.10         | 4.84         |
| 73 | TTTY8     | 8177048   | 5.10       | 4.08         | 4.06         | 3.96         | 4.40         | 4.04         | 3.66         | 4.32         | 4.94         | 3.84         | 4.19         | 4.05         | 3.93         | 4.47         | 4.05         | 4.01         |
|    |           | 8176553   | 5.10       | 4.08         | 4.06         | 3.96         | 4.40         | 4.04         | 3.66         | 4.32         | 4.94         | 3.84         | 4.19         | 4.05         | 3.93         | 4.47         | 4.05         | 4.01         |
| 74 | TXLNG2P   | 8176698   | 7.03       | 7.87         | 7.41         | 7.69         | 7.41         | 7.47         | 7.51         | 7.55         | 6.52         | 4.59         | 4.11         | 4.39         | 4.33         | 4.12         | 4.08         | 4.24         |
|    |           | 8176709   | 7.00       | 7.36         | 6.78         | 7.39         | 6.91         | 7.31         | 6.90         | 7.46         | 5.61         | 6.91         | 3.41         | 3.29         | 3.76         | 3.55         | 3.47         | 3.56         |
| 75 | USP9Y     | 8176578   | 6.69       | 7.76         | 7.05         | 7.69         | 7.29         | 7.23         | 7.12         | 7.48         | 5.76         | 3.65         | 3.70         | 3.55         | 3.62         | 3.70         | 3.82         | 3.79         |
| 76 | UTY       | 8177137   | 7.83       | 8.14         | 8.04         | 8.28         | 7.98         | 8.22         | 7.92         | 8.22         | 7.12         | 3.71         | 3.68         | 3.68         | 3.66         | 3.51         | 3.81         | 3.73         |
| 77 | VAMP7     | 8176962   | 7.73       | 8.15         | 8.03         | 8.15         | 8.17         | 8.55         | 8.15         | 8.31         | 7.47         | 7.70         | 8.00         | 8.39         | 8.21         | 8.27         | 8.20         | 8.01         |
| 78 | VCY       | 8176650   | 5.14       | 5.23         | 5.75         | 5.41         | 5.56         | 5.12         | 5.28         | 5.15         | 6.24         | 5.66         | 5.35         | 5.38         | 5.41         | 5.61         | 5.59         | 5.52         |
|    |           | 8177169   | 5.14       | 5.23         | 5.75         | 5.41         | 5.56         | 5.12         | 5.28         | 5.15         | 6.24         | 5.66         | 5.35         | 5.38         | 5.41         | 5.61         | 5.59         | 5.52         |
| 79 | XKRY      | 8177180   | 3.22       | 3.02         | 3.20         | 3.06         | 3.04         | 2.77         | 3.14         | 3.35         | 3.26         | 3.13         | 3.10         | 2.83         | 3.01         | 2.93         | 3.23         | 3.11         |
|    |           | 8176675   | 3.22       | 3.02         | 3.20         | 3.06         | 3.04         | 2.77         | 3.14         | 3.35         | 3.26         | 3.13         | 3.10         | 2.83         | 3.01         | 2.93         | 3.23         | 3.11         |
| 80 | ZBED1     | 8177029   | 7.71       | 7.78         | 7.87         | 7.72         | 7.80         | 7.87         | 7.87         | 7.87         | 7.87         | 7.70         | 7.73         | 7.88         | 7.79         | 7.76         | 7.86         | 7.73         |
| 81 | ZFY       | 8176384   | 6.68       | 7.36         | 7.31         | 7.35         | 7.27         | 7.10         | 6.97         | 7.18         | 6.35         | 4.36         | 4.36         | 4.57         | 4.21         | 4.42         | 4.20         | 4.71         |
| 82 | 0         | 8176469   | 4.03       | 5.46         | 4.37         | 5.24         | 4.66         | 4.45         | 4.73         | 5.66         | 3.97         | 3.73         | 3.43         | 3.36         | 3.14         | 3.50         | 3.38         | 3.30         |
| 83 | 0         | 8177068   | 2.43       | 2.69         | 2.38         | 2.67         | 2.69         | 2.87         | 2.83         | 2.35         | 2.64         | 2.30         | 2.15         | 2.56         | 2.34         | 2.34         | 2.36         | 2.09         |
| 84 | 0         | 8176648   | 6.94       | 6.64         | 6.58         | 6.71         | 6.71         | 6.64         | 6.55         | 6.51         | 7.42         | 6.15         | 6.47         | 6.40         | 6.53         | 6.23         | 6.48         | 6.37         |
| 85 | 0         | 8177227   | 2.70       | 3.03         | 3.34         | 2.94         | 2.83         | 3.04         | 2.88         | 3.15         | 2.78         | 3.13         | 2.94         | 3.07         | 2.99         | 2.94         | 3.41         | 3.21         |
| 86 | 0         | 8177403   | 3.44       | 3.51         | 3.72         | 3.54         | 3.54         | 3.44         | 3.47         | 3.67         | 3.81         | 4.00         | 3.64         | 3.62         | 3.64         | 3.64         | 4.11         | 3.51         |
| 87 | 0         | 8176931   | 3.44       | 3.51         | 3.72         | 3.54         | 3.54         | 3.44         | 3.47         | 3.67         | 3.81         | 4.00         | 3.64         | 3.62         | 3.64         | 3.64         | 4.11         | 3.51         |
| 88 | 0         | 8177092   | 4.82       | 4.53         | 4.51         | 4.22         | 4.47         | 4.07         | 4.67         | 4.37         | 5.31         | 4.23         | 4.36         | 3.89         | 4.10         | 4.57         | 4.72         | 4.30         |
| 89 | 0         | 8176476   | 2.36       | 2.71         | 3.07         | 2.49         | 2.61         | 2.53         | 2.44         | 2.53         | 2.98         | 2.81         | 2.67         | 3.05         | 2.74         | 2.71         | 3.00         | 2.80         |
| 90 | 0         | 8176663   | 2.99       | 3.04         | 3.14         | 2.97         | 3.26         | 2.71         | 2.87         | 2.97         | 3.02         | 3.20         | 3.01         | 2.98         | 3.13         | 2.94         | 3.52         | 3.32         |

|     | Gene Name | Probesets | NI0627.CEL | VE9-0291.CEL | VE9-0336.CEL | VE9-0432.CEL | VE9-0472.CEL | VE9-0515.CEL | VE9-0567.CEL | VE9-0687.CEL | VE9-0817.CEL | VE9-1036.CEL | VE9-1050.CEL | VE9-0697.CEL | VE9-0739.CEL | VE9-0748.CEL | VE9-0307.CEL | VE9-0039.CEL |
|-----|-----------|-----------|------------|--------------|--------------|--------------|--------------|--------------|--------------|--------------|--------------|--------------|--------------|--------------|--------------|--------------|--------------|--------------|
| 91  | 0         | 8177176   | 2.99       | 3.04         | 3.14         | 2.97         | 3.26         | 2.71         | 2.87         | 2.97         | 3.02         | 3.20         | 3.01         | 2.98         | 3.13         | 2.94         | 3.52         | 3.32         |
| 92  | 0         | 8176779   | 4.17       | 4.26         | 4.56         | 4.31         | 4.16         | 4.43         | 4.47         | 4.20         | 4.61         | 4.79         | 4.49         | 4.42         | 4.27         | 4.44         | 4.62         | 4.43         |
| 93  | 0         | 8177044   | 3.53       | 3.88         | 4.16         | 3.68         | 3.61         | 3.84         | 3.74         | 3.74         | 4.06         | 4.44         | 3.81         | 4.21         | 3.60         | 4.04         | 3.77         | 3.94         |
| 94  | 0         | 8176419   | 6.25       | 5.17         | 5.28         | 5.36         | 5.24         | 5.16         | 5.31         | 5.09         | 5.67         | 5.32         | 5.21         | 5.14         | 5.23         | 5.42         | 5.23         | 5.10         |
| 95  | 0         | 8176679   | 3.95       | 4.27         | 4.16         | 3.95         | 3.75         | 4.27         | 3.80         | 4.09         | 4.29         | 4.02         | 4.09         | 3.82         | 3.89         | 3.92         | 4.01         | 3.99         |
| 96  | 0         | 8177212   | 3.95       | 4.27         | 4.16         | 3.95         | 3.75         | 4.27         | 3.80         | 4.09         | 4.29         | 4.02         | 4.09         | 3.82         | 3.89         | 3.92         | 4.01         | 3.99         |
| 97  | 0         | 8176415   | 2.25       | 3.10         | 2.99         | 2.96         | 2.56         | 2.79         | 2.84         | 2.31         | 2.91         | 2.97         | 2.73         | 2.80         | 3.02         | 2.72         | 2.86         | 2.98         |
| 98  | 0         | 8176677   | 5.99       | 5.54         | 5.82         | 5.79         | 5.67         | 5.65         | 6.02         | 5.43         | 6.31         | 5.92         | 6.06         | 5.63         | 5.74         | 5.62         | 5.27         | 5.81         |
| 99  | 0         | 8177178   | 5.99       | 5.54         | 5.82         | 5.79         | 5.67         | 5.65         | 6.02         | 5.43         | 6.31         | 5.92         | 6.06         | 5.63         | 5.74         | 5.62         | 5.27         | 5.81         |
| 100 | 0         | 8176576   | 3.84       | 3.76         | 3.95         | 3.58         | 3.56         | 3.58         | 3.82         | 3.55         | 4.65         | 3.60         | 4.20         | 3.52         | 3.73         | 3.60         | 3.60         | 3.91         |
| 101 | 0         | 8177303   | 4.23       | 3.13         | 3.34         | 3.21         | 3.25         | 3.16         | 3.30         | 3.11         | 3.71         | 3.24         | 3.25         | 3.14         | 3.18         | 3.42         | 3.30         | 3.34         |
| 102 | 0         | 8176478   | 2.96       | 2.87         | 3.23         | 2.99         | 2.78         | 3.15         | 3.07         | 3.03         | 3.32         | 2.89         | 2.85         | 3.23         | 2.89         | 2.93         | 3.05         | 3.20         |
| 103 | 0         | 8176949   | 4.39       | 4.83         | 5.39         | 4.64         | 4.72         | 4.58         | 4.44         | 4.47         | 4.98         | 5.85         | 4.72         | 5.01         | 4.62         | 4.06         | 4.95         | 5.20         |
| 104 | 0         | 8177387   | 3.39       | 2.53         | 2.89         | 2.12         | 2.52         | 2.44         | 2.48         | 2.80         | 2.91         | 2.33         | 2.25         | 3.29         | 2.43         | 2.72         | 2.68         | 2.20         |
| 105 | 0         | 8176947   | 3.39       | 2.53         | 2.89         | 2.12         | 2.52         | 2.44         | 2.48         | 2.80         | 2.91         | 2.33         | 2.25         | 3.29         | 2.43         | 2.72         | 2.68         | 2.20         |
| 106 | 0         | 8177083   | 4.80       | 3.61         | 3.74         | 3.92         | 3.82         | 3.76         | 3.53         | 4.02         | 4.24         | 4.49         | 3.79         | 3.93         | 3.98         | 4.37         | 3.70         | 3.94         |
| 107 | 0         | 8177174   | 2.02       | 2.22         | 2.51         | 1.98         | 2.05         | 2.18         | 2.23         | 2.06         | 2.15         | 2.11         | 2.05         | 2.43         | 2.21         | 2.28         | 2.28         | 2.13         |
| 108 | 0         | 8177184   | 2.47       | 2.83         | 2.76         | 2.69         | 2.82         | 2.58         | 3.02         | 2.81         | 3.03         | 2.70         | 2.44         | 2.92         | 2.49         | 3.18         | 2.74         | 2.55         |
| 109 | 0         | 8176673   | 2.47       | 2.83         | 2.76         | 2.69         | 2.82         | 2.58         | 3.02         | 2.81         | 3.03         | 2.70         | 2.44         | 2.92         | 2.49         | 3.18         | 2.74         | 2.55         |
| 110 | 0         | 8177193   | 5.21       | 3.88         | 4.45         | 3.85         | 3.90         | 4.09         | 3.91         | 3.85         | 4.90         | 4.70         | 4.10         | 4.21         | 4.23         | 4.33         | 4.42         | 4.29         |
| 111 | 0         | 8176665   | 5.21       | 3.88         | 4.45         | 3.85         | 3.90         | 4.09         | 3.91         | 3.85         | 4.90         | 4.70         | 4.10         | 4.21         | 4.23         | 4.33         | 4.42         | 4.29         |
| 112 | 0         | 8176480   | 2.54       | 2.54         | 2.79         | 2.62         | 2.61         | 2.75         | 2.72         | 2.61         | 2.84         | 2.83         | 2.46         | 2.68         | 2.56         | 2.78         | 2.80         | 2.53         |
| 113 | 0         | 8176566   | 9.79       | 9.58         | 10.12        | 9.76         | 9.71         | 9.40         | 9.95         | 9.48         | 9.78         | 10.37        | 10.05        | 9.68         | 9.76         | 9.39         | 9.47         | 10.06        |
| 114 | 0         | 8177070   | 2.47       | 2.68         | 2.62         | 2.93         | 2.65         | 2.50         | 2.66         | 2.76         | 2.79         | 2.67         | 2.54         | 2.77         | 2.43         | 2.90         | 2.71         | 2.39         |
| 115 | 0         | 8176986   | 5.53       | 5.87         | 6.11         | 5.53         | 5.88         | 5.54         | 5.82         | 5.72         | 6.42         | 6.20         | 5.81         | 5.69         | 5.51         | 5.80         | 6.02         | 5.91         |
| 116 | 0         | 8176373   | 3.65       | 4.00         | 3.79         | 3.66         | 3.62         | 3.81         | 3.83         | 3.89         | 4.05         | 3.99         | 3.63         | 3.95         | 3.80         | 3.77         | 4.32         | 3.83         |
| 117 | 0         | 8176395   | 10.61      | 11.12        | 10.60        | 11.32        | 11.18        | 10.51        | 11.32        | 10.46        | 10.80        | 11.21        | 11.36        | 10.70        | 10.96        | 10.75        | 10.32        | 10.94        |
| 118 | 0         | 8177401   | 3.40       | 3.51         | 3.38         | 3.25         | 3.60         | 3.47         | 3.34         | 3.56         | 4.09         | 3.26         | 3.57         | 3.62         | 3.52         | 3.70         | 3.43         | 3.76         |
| 119 | 0         | 8176933   | 3.40       | 3.51         | 3.38         | 3.25         | 3.60         | 3.47         | 3.34         | 3.56         | 4.09         | 3.26         | 3.57         | 3.62         | 3.52         | 3.70         | 3.43         | 3.76         |
| 120 | 0         | 8176482   | 5.27       | 5.18         | 5.20         | 4.93         | 5.40         | 5.00         | 5.19         | 4.83         | 5.05         | 5.19         | 5.56         | 4.81         | 5.02         | 5.45         | 5.11         | 4.97         |
| 121 | 0         | 8176921   | 8.84       | 8.28         | 8.32         | 7.86         | 8.13         | 7.83         | 8.42         | 8.08         | 8.88         | 8.62         | 8.50         | 8.05         | 8.25         | 8.23         | 8.17         | 8.41         |
| 122 | 0         | 8177424   | 8.84       | 8.28         | 8.32         | 7.86         | 8.13         | 7.83         | 8.42         | 8.08         | 8.88         | 8.62         | 8.50         | 8.05         | 8.25         | 8.23         | 8.17         | 8.41         |
| 123 | 0         | 8177079   | 2.61       | 2.49         | 2.96         | 3.15         | 2.51         | 2.68         | 2.53         | 2.43         | 2.40         | 2.71         | 2.53         | 2.62         | 2.79         | 2.52         | 2.85         | 2.59         |
| 124 | 0         | 8177081   | 4.63       | 4.06         | 4.37         | 4.10         | 3.90         | 4.09         | 4.16         | 3.92         | 4.65         | 4.42         | 4.30         | 4.06         | 3.98         | 4.18         | 4.24         | 4.39         |
