# Supplementary material for: A novel approach for human whole transcriptome analysis based on absolute gene expression of microarray data
Source: PeerJ journal article supplement (doi:10.7717/peerj.4133), 2017-12-08
Supplement: S3_Table.pdf [file S3_Table.pdf]

|                     | <b>Sex</b> | <b>DDX3Y</b>   | <b>EIF1AY</b>  | <b>TXLNG2P</b> |                |
|---------------------|------------|----------------|----------------|----------------|----------------|
| <b>ID/Probesets</b> |            | <b>8176624</b> | <b>8176719</b> | <b>8176709</b> | <b>8176698</b> |
| NI0627.CEL          | M          | 8.81           | 7.65           | 7.00           | 7.03           |
| VE9-0291.CEL        | M          | 9.19           | 8.51           | 7.36           | 7.87           |
| VE9-0336.CEL        | M          | 9.10           | 8.39           | 6.78           | 7.41           |
| VE9-0432.CEL        | M          | 9.44           | 8.63           | 7.39           | 7.69           |
| VE9-0472.CEL        | M          | 9.27           | 8.40           | 6.91           | 7.41           |
| VE9-0515.CEL        | M          | 9.51           | 9.19           | 7.31           | 7.47           |
| VE9-0567.CEL        | M          | 9.16           | 8.79           | 6.90           | 7.51           |
| VE9-0687.CEL        | M          | 9.46           | 9.14           | 7.46           | 7.55           |
| VE9-0817.CEL        | M          | 8.09           | 7.86           | 5.61           | 6.52           |
| VE9-0039.CEL        | F          | 4.45           | 2.93           | 3.36           | 4.24           |
| VE9-0307.CEL        | F          | 3.99           | 3.25           | 3.56           | 4.08           |
| VE9-0697.CEL        | F          | 4.24           | 3.46           | 3.76           | 4.39           |
| VE9-0739.CEL        | F          | 4.15           | 3.37           | 3.55           | 4.33           |
| VE9-0748.CEL        | F          | 4.30           | 3.11           | 3.47           | 4.12           |
| VE9-1036.CEL        | F          | 4.21           | 2.83           | 3.41           | 4.59           |
| VE9-1050.CEL        | F          | 4.13           | 3.14           | 3.29           | 4.11           |
