# Supplementary material for: A novel approach for human whole transcriptome analysis based on absolute gene expression of microarray data
Source: PeerJ journal article supplement (doi:10.7717/peerj.4133), 2017-12-08
Supplement: S4_Table.pdf [file S4_Table.pdf]

|              | sex | COX6A1  | COX6A1  | CYC1    | GAPDH   | GSK3A   | H6PD    | LTBP4   | MDH1    | MTX1    | SDHA    | VEGFB   | SRY     |
|--------------|-----|---------|---------|---------|---------|---------|---------|---------|---------|---------|---------|---------|---------|
| ID/Probesets |     | 7959153 | 8119153 | 8148728 | 7953385 | 8037152 | 7897441 | 8028872 | 8042259 | 7905968 | 8104166 | 7940904 | 8177038 |
| NI0627.CEL   | M   | 7.91    | 7.98    | 7.18    | 11.74   | 7.08    | 5.91    | 6.62    | 7.18    | 6.09    | 9.17    | 7.05    | 3.30    |
| VE9-0291.CEL | M   | 8.02    | 8.00    | 7.27    | 11.00   | 7.93    | 6.72    | 6.89    | 7.03    | 6.06    | 9.50    | 7.56    | 3.55    |
| VE9-0336.CEL | M   | 7.71    | 7.70    | 7.24    | 11.34   | 7.56    | 6.33    | 6.94    | 6.68    | 6.06    | 9.20    | 7.50    | 3.62    |
| VE9-0432.CEL | M   | 8.01    | 8.05    | 7.40    | 11.11   | 7.69    | 6.34    | 6.81    | 7.12    | 5.86    | 9.24    | 7.36    | 3.36    |
| VE9-0472.CEL | M   | 8.13    | 8.15    | 7.69    | 11.50   | 7.87    | 6.37    | 6.72    | 7.29    | 5.98    | 9.30    | 7.52    | 3.53    |
| VE9-0515.CEL | M   | 8.22    | 8.14    | 7.53    | 11.80   | 7.52    | 6.22    | 6.44    | 7.40    | 6.22    | 9.36    | 7.23    | 3.49    |
| VE9-0567.CEL | M   | 8.09    | 8.05    | 7.36    | 11.05   | 7.96    | 6.44    | 6.79    | 6.78    | 6.07    | 9.12    | 7.28    | 3.36    |
| VE9-0687.CEL | M   | 8.22    | 8.23    | 7.41    | 11.44   | 7.71    | 6.48    | 6.65    | 7.28    | 6.04    | 9.33    | 7.29    | 3.07    |
| VE9-0817.CEL | M   | 7.78    | 7.89    | 6.89    | 11.17   | 7.37    | 6.40    | 7.47    | 5.87    | 6.38    | 8.44    | 7.47    | 3.77    |
| VE9-1036.CEL | F   | 7.81    | 7.85    | 6.94    | 11.07   | 7.69    | 6.39    | 6.96    | 6.64    | 6.07    | 8.85    | 7.36    | 3.28    |
| VE9-1050.CEL | F   | 8.02    | 8.01    | 7.35    | 11.16   | 7.74    | 6.38    | 6.78    | 6.82    | 5.85    | 8.97    | 7.04    | 3.20    |
| VE9-0697.CEL | F   | 7.91    | 7.88    | 6.96    | 11.13   | 7.54    | 6.43    | 6.49    | 6.94    | 5.96    | 9.42    | 7.13    | 3.13    |
| VE9-0739.CEL | F   | 8.06    | 8.02    | 7.27    | 11.45   | 7.50    | 6.54    | 6.94    | 6.92    | 6.24    | 8.95    | 7.19    | 3.24    |
| VE9-0748.CEL | F   | 7.71    | 7.75    | 6.94    | 11.07   | 7.78    | 6.48    | 6.52    | 6.51    | 6.22    | 8.91    | 7.20    | 3.11    |
| VE9-0307.CEL | F   | 8.16    | 8.12    | 7.21    | 11.68   | 7.81    | 6.46    | 6.63    | 6.95    | 6.01    | 9.10    | 7.62    | 3.66    |
| VE9-0039.CEL | F   | 7.96    | 7.96    | 7.15    | 11.04   | 7.76    | 6.28    | 6.71    | 6.71    | 6.23    | 9.06    | 7.39    | 3.68    |
