# Supplementary material for: A novel approach for human whole transcriptome analysis based on absolute gene expression of microarray data
Source: PeerJ journal article supplement (doi:10.7717/peerj.4133), 2017-12-08
Supplement: S5_Table.pdf [file S5_Table.pdf]

| <b>ID</b>    | <b>Sex</b> | <b>TXNIP</b> | <b>B2M</b> | <b>PYHIN1</b> | <b>ZZZ3</b> | <b>BEND7</b> | <b>CAPN11</b> | <b>ZNF99</b> | <b>ABCA6</b> | <b>UBE2U</b> | <b>C3orf30</b> |
|--------------|------------|--------------|------------|---------------|-------------|--------------|---------------|--------------|--------------|--------------|----------------|
| NI0627.CEL   | M          | 12.61        | 12.30      | 7.32          | 6.89        | 4.40         | 4.79          | 3.48         | 3.32         | 3.16         | 3.07           |
| VE9-0291.CEL | M          | 12.85        | 12.18      | 7.86          | 7.70        | 4.07         | 4.50          | 3.57         | 3.58         | 2.91         | 3.11           |
| VE9-0336.CEL | M          | 12.79        | 11.94      | 7.21          | 7.37        | 4.35         | 4.54          | 3.66         | 3.69         | 3.13         | 3.25           |
| VE9-0432.CEL | M          | 12.84        | 12.23      | 7.83          | 7.75        | 4.06         | 4.26          | 3.44         | 3.55         | 2.79         | 3.24           |
| VE9-0472.CEL | M          | 12.75        | 12.16      | 7.57          | 7.47        | 4.32         | 4.15          | 3.39         | 3.47         | 2.80         | 3.01           |
| VE9-0515.CEL | M          | 13.01        | 12.41      | 7.84          | 7.46        | 4.42         | 4.02          | 3.50         | 3.63         | 2.92         | 3.00           |
| VE9-0567.CEL | M          | 12.93        | 12.41      | 7.09          | 7.28        | 4.60         | 4.16          | 3.45         | 3.39         | 3.02         | 3.03           |
| VE9-0687.CEL | M          | 12.90        | 12.37      | 7.91          | 7.55        | 4.66         | 4.29          | 3.59         | 3.58         | 2.83         | 3.14           |
| VE9-0817.CEL | M          | 12.69        | 11.77      | 6.51          | 6.25        | 4.99         | 4.96          | 3.59         | 3.81         | 3.13         | 3.23           |
| VE9-1036.CEL | F          | 12.53        | 11.96      | 6.58          | 7.28        | 4.28         | 4.26          | 3.44         | 3.40         | 2.85         | 3.07           |
| VE9-1050.CEL | F          | 12.54        | 12.37      | 6.87          | 6.99        | 4.92         | 4.48          | 3.40         | 3.58         | 2.91         | 3.06           |
| VE9-0697.CEL | F          | 12.91        | 12.40      | 7.76          | 7.67        | 4.41         | 4.39          | 3.56         | 3.35         | 3.02         | 3.15           |
| VE9-0739.CEL | F          | 12.77        | 12.35      | 7.02          | 7.21        | 4.52         | 4.29          | 3.27         | 3.33         | 2.91         | 3.07           |
| VE9-0748.CEL | F          | 12.85        | 12.05      | 7.37          | 7.39        | 4.21         | 4.35          | 3.46         | 3.59         | 2.98         | 3.21           |
| VE9-0307.CEL | F          | 12.69        | 12.08      | 7.44          | 7.28        | 4.54         | 4.50          | 3.80         | 3.61         | 3.04         | 3.51           |
| VE9-0039.CEL | F          | 12.81        | 12.17      | 6.77          | 7.77        | 4.29         | 4.43          | 3.41         | 3.71         | 2.98         | 3.26           |
