# Supplementary material for: A novel approach for human whole transcriptome analysis based on absolute gene expression of microarray data
Source: PeerJ journal article supplement (doi:10.7717/peerj.4133), 2017-12-08
Supplement: S8_Table.pdf [file S8_Table.pdf]

| <b>Sample #</b> | <b>ID</b>    |
|-----------------|--------------|
| sample1         | NI0627.CEL   |
| sample2         | VE9-0039.CEL |
| sample3         | VE9-0291.CEL |
| sample4         | VE9-0307.CEL |
| sample5         | VE9-0336.CEL |
| sample6         | VE9-0432.CEL |
| sample7         | VE9-0472.CEL |
| sample8         | VE9-0515.CEL |
| sample9         | VE9-0567.CEL |
| sample10        | VE9-0687.CEL |
| sample11        | VE9-0697.CEL |
| sample12        | VE9-0739.CEL |
| sample13        | VE9-0748.CEL |
| sample14        | VE9-0817.CEL |
| sample15        | VE9-1036.CEL |
| sample16        | VE9-1050.CEL |
