# Supplementary material for: A novel approach for human whole transcriptome analysis based on absolute gene expression of microarray data
Source: PeerJ journal article supplement (doi:10.7717/peerj.4133), 2017-12-08
Supplement: S9_Table.pdf [file S9_Table.pdf]

| Ranking | Pathway Name                                     | # Gene | p value  |
|---------|--------------------------------------------------|--------|----------|
| 1       | Ribosome                                         | 61     | 7.62E-64 |
| 2       | Phagosome                                        | 52     | 5.67E-35 |
| 3       | Regulation of actin cytoskeleton                 | 54     | 3.43E-29 |
| 4       | Antigen processing and presentation              | 31     | 9.22E-24 |
| 5       | Fc gamma R-mediated phagocytosis                 | 33     | 6.49E-23 |
| 6       | Leishmaniasis                                    | 29     | 3.37E-22 |
| 7       | Chemokine signaling pathway                      | 43     | 1.62E-21 |
| 8       | Osteoclast differentiation                       | 36     | 1.92E-21 |
| 9       | Protein processing in endoplasmic reticulum      | 40     | 3.21E-21 |
| 10      | Natural killer cell mediated cytotoxicity        | 35     | 1.5E-19  |
| 11      | Endocytosis                                      | 41     | 7.79E-19 |
| 12      | Pathways in cancer                               | 52     | 8.53E-19 |
| 13      | Leukocyte transendothelial migration             | 30     | 5.74E-17 |
| 14      | Focal adhesion                                   | 38     | 1.76E-16 |
| 15      | Hematopoietic cell lineage                       | 26     | 2.24E-16 |
| 16      | Viral myocarditis                                | 23     | 1.05E-15 |
| 17      | Shigellosis                                      | 21     | 7.19E-15 |
| 18      | Pathogenic Escherichia coli infection            | 20     | 1.45E-14 |
| 19      | Toxoplasmosis                                    | 29     | 1.57E-14 |
| 20      | B cell receptor signaling pathway                | 22     | 5.77E-14 |
| 21      | Staphylococcus aureus infection                  | 19     | 1.3E-13  |
| 22      | T cell receptor signaling pathway                | 25     | 3.26E-13 |
| 23      | Cell adhesion molecules (CAMs)                   | 27     | 9.31E-13 |
| 24      | Rheumatoid arthritis                             | 22     | 3.84E-12 |
| 25      | Allograft rejection                              | 15     | 4.08E-12 |
| 26      | Jak-STAT signaling pathway                       | 28     | 6.1E-12  |
| 27      | MAPK signaling pathway                           | 37     | 7.93E-12 |
| 28      | Spliceosome                                      | 25     | 1.22E-11 |
| 29      | Neurotrophin signaling pathway                   | 25     | 1.22E-11 |
| 30      | Long-term potentiation                           | 19     | 1.25E-11 |
| 31      | Graft-versus-host disease                        | 15     | 1.95E-11 |
| 32      | Type I diabetes mellitus                         | 15     | 4.23E-11 |
| 33      | Prostate cancer                                  | 20     | 1.33E-10 |
| 34      | Chagas disease (American trypanosomiasis)        | 21     | 3.59E-10 |
| 35      | Autoimmune thyroid disease                       | 15     | 8.5E-10  |
| 36      | Fc epsilon RI signaling pathway                  | 18     | 9.4E-10  |
| 37      | Renal cell carcinoma                             | 17     | 9.55E-10 |
| 38      | Lysosome                                         | 22     | 9.55E-10 |
| 39      | Bacterial invasion of epithelial cells           | 17     | 9.55E-10 |
| 40      | Systemic lupus erythematosus                     | 23     | 1.64E-09 |
| 41      | Chronic myeloid leukemia                         | 17     | 1.82E-09 |
| 42      | Insulin signaling pathway                        | 23     | 2.11E-09 |
| 43      | Vascular smooth muscle contraction               | 21     | 2.4E-09  |
| 44      | Epithelial cell signaling in Helicobacter pylori | 16     | 4.68E-09 |

|    |             |    |          |
|----|-------------|----|----------|
|    | infection   |    |          |
| 45 | Hepatitis C | 22 | 6.23E-09 |
