# Supplementary material for: A novel approach for human whole transcriptome analysis based on absolute gene expression of microarray data
Source: PeerJ journal article supplement (doi:10.7717/peerj.4133), 2017-12-08
Supplement: S10_Table.pdf [file S10_Table.pdf]

| <b>Ranking</b> | <b>Pathway Name</b>                          | <b># Gene</b> | <b>p value</b> |
|----------------|----------------------------------------------|---------------|----------------|
| 1              | Metabolic pathways                           | 266           | 2.57E-148      |
| 2              | Ribosome                                     | 76            | 4.39E-95       |
| 3              | Oxidative phosphorylation                    | 60            | 4.07E-51       |
| 4              | Parkinson's disease                          | 59            | 2.5E-50        |
| 5              | Huntington's disease                         | 64            | 4.26E-46       |
| 6              | Protein processing in endoplasmic reticulum  | 60            | 1.97E-44       |
| 7              | Alzheimer's disease                          | 58            | 1.1E-41        |
| 8              | Complement and coagulation cascades          | 38            | 9.19E-37       |
| 9              | Drug metabolism - cytochrome P450            | 30            | 3.5E-24        |
| 10             | Fatty acid metabolism                        | 23            | 6.2E-22        |
| 11             | Valine, leucine and isoleucine degradation   | 23            | 1.15E-21       |
| 12             | Metabolism of xenobiotics by cytochrome P450 | 27            | 8.03E-21       |
| 13             | Glycolysis / Gluconeogenesis                 | 25            | 1.8E-19        |
| 14             | Protein export                               | 16            | 4.54E-18       |
| 15             | Arginine and proline metabolism              | 22            | 7.13E-18       |
| 16             | Peroxisome                                   | 25            | 3.6E-17        |
| 17             | Glycine, serine and threonine metabolism     | 17            | 2.19E-16       |
| 18             | Retinol metabolism                           | 22            | 4.47E-16       |
| 19             | PPAR signaling pathway                       | 22            | 3.75E-15       |
| 20             | Propanoate metabolism                        | 16            | 5.9E-15        |
| 21             | Cardiac muscle contraction                   | 22            | 3.23E-14       |
| 22             | RNA transport                                | 28            | 9.25E-13       |
| 23             | Tryptophan metabolism                        | 16            | 1.04E-12       |
| 24             | Citrate cycle (TCA cycle)                    | 14            | 1.13E-12       |
| 25             | Phagosome                                    | 28            | 1.15E-12       |
| 26             | Proteasome                                   | 16            | 2.17E-12       |
| 27             | Pyruvate metabolism                          | 15            | 6.83E-12       |
| 28             | Tyrosine metabolism                          | 15            | 1.01E-11       |
| 29             | Pathogenic Escherichia coli infection        | 17            | 1.05E-11       |
| 30             | Glutathione metabolism                       | 16            | 1.84E-11       |
| 31             | beta-Alanine metabolism                      | 11            | 1.44E-10       |
| 32             | Butanoate metabolism                         | 12            | 4.36E-10       |
| 33             | Drug metabolism - other enzymes              | 15            | 4.36E-10       |
| 34             | Steroid hormone biosynthesis                 | 15            | 1.34E-09       |
| 35             | Primary bile acid biosynthesis               | 9             | 2.21E-09       |
| 36             | Bile secretion                               | 16            | 5.23E-09       |
| 37             | Spliceosome                                  | 21            | 5.81E-09       |
