# Supplementary material for: A novel approach for human whole transcriptome analysis based on absolute gene expression of microarray data
Source: PeerJ journal article supplement (doi:10.7717/peerj.4133), 2017-12-08
Supplement: Table_S6.pdf [file Table_S6.pdf]

| ID       | Sex | qPCR    | DDX3Y    | EIF1AY   | TXLNG2P  |
|----------|-----|---------|----------|----------|----------|
| NI0627   | M   | Ct      | 27.51    | 28.34    | 25.57    |
|          |     | Rel Exp | 2.48E-02 | 1.39E-02 | 9.53E-02 |
| VE9-0291 | M   | Ct      | 26.74    | 26.04    | 24.99    |
|          |     | Rel Exp | 2.51E-02 | 4.08E-02 | 8.46E-02 |
| VE9-0336 | M   | Ct      | 25.67    | 24.93    | 24.49    |
|          |     | Rel Exp | 3.35E-02 | 5.61E-02 | 7.62E-02 |
| VE9-0432 | M   | Ct      | 25.97    | 25.64    | 24.76    |
|          |     | Rel Exp | 5.14E-02 | 6.48E-02 | 0.1191   |
| VE9-0472 | M   | Ct      | 26.15    | 26.48    | 24.34    |
|          |     | Rel Exp | 3.88E-02 | 3.09E-02 | 0.1362   |
| VE9-0515 | M   | Ct      | 25.63    | 26.30    | 24.11    |
|          |     | Rel Exp | 2.99E-02 | 1.89E-02 | 8.59E-02 |
| VE9-0567 | M   | Ct      | 26.44    | 25.13    | 25.55    |
|          |     | Rel Exp | 2.57E-02 | 6.39E-02 | 4.76E-02 |
| VE9-0687 | M   | Ct      | 25.84    | 26.26    | 24.75    |
|          |     | Rel Exp | 3.19E-02 | 2.40E-02 | 6.81E-02 |
| VE9-0817 | M   | Ct      | 26.51    | 25.73    | 25.50    |
|          |     | Rel Exp | 3.33E-02 | 5.71E-02 | 6.66E-02 |
| VE9-0039 | F   | Ct      | 32.52    | 34.17    | 38.35    |
|          |     | Rel Exp | 7.30E-04 | 2.33E-04 | 1.29E-05 |
| VE9-0307 | F   | Ct      | 31.42    | 34.09    | 40.00    |
|          |     | Rel Exp | 1.39E-03 | 2.18E-04 | 3.63E-06 |
| VE9-0697 | F   | Ct      | 31.73    | 33.58    | 38.82    |
|          |     | Rel Exp | 1.57E-03 | 4.36E-04 | 1.16E-05 |
| VE9-0739 | F   | Ct      | 30.22    | 32.70    | 37.13    |
|          |     | Rel Exp | 1.52E-03 | 2.73E-04 | 1.26E-05 |
| VE9-0748 | F   | Ct      | 31.94    | 33.69    | 36.79    |
|          |     | Rel Exp | 9.34E-04 | 2.77E-04 | 3.23E-05 |
| VE9-1036 | F   | Ct      | 32.78    | 33.54    | 35.81    |
|          |     | Rel Exp | 4.90E-04 | 2.88E-04 | 5.98E-05 |
| VE9-1050 | F   | Ct      | 31.95    | 33.15    | 35.70    |
|          |     | Rel Exp | 5.55E-04 | 2.42E-04 | 4.13E-05 |
