# Supplementary material for: A novel approach for human whole transcriptome analysis based on absolute gene expression of microarray data
Source: PeerJ journal article supplement (doi:10.7717/peerj.4133), 2017-12-08
Supplement: Table_S7.pdf [file Table_S7.pdf]

| ID       | Sex | qPCR    | TXNIP | B2M   | ZZZ3     | PYHIN1   | CAPN11   | BEND7    | ZNF299   | ABCA6    | C3ORF30  | UBE2U    |
|----------|-----|---------|-------|-------|----------|----------|----------|----------|----------|----------|----------|----------|
| NI0627   | M   | Ct      | 21.56 | 18.72 | 27.55    | 25.60    | 32.51    | 26.77    | 36.27    | 33.60    | 40.00    | 35.33    |
|          |     | Rel Exp | 1.528 | 11.01 | 2.41E-02 | 9.30E-02 | 7.73E-04 | 4.15E-02 | 5.74E-05 | 3.65E-04 | 4.31E-06 | 1.10E-04 |
| VE9-0291 | M   | Ct      | 20.54 | 17.33 | 26.46    | 24.48    | 33.56    | 40.00    | 34.47    | 33.11    | 0.00     | 40.00    |
|          |     | Rel Exp | 1.844 | 17.07 | 3.05E-02 | 0.1202   | 2.22E-04 | 2.56E-06 | 1.18E-04 | 3.03E-04 | 0        | 2.56E-06 |
| VE9-0336 | M   | Ct      | 19.76 | 16.73 | 25.69    | 23.78    | 34.55    | 37.35    | 40.00    | 32.48    | 40.00    | 0.00     |
|          |     | Rel Exp | 2.02  | 16.49 | 3.31E-02 | 0.1245   | 7.11E-05 | 1.03E-05 | 1.63E-06 | 3.00E-04 | 1.63E-06 | 0        |
| VE9-0432 | M   | Ct      | 19.95 | 16.86 | 26.04    | 23.85    | 34.89    | 34.50    | 40.00    | 32.10    | 0.00     | 0.00     |
|          |     | Rel Exp | 3.332 | 28.56 | 4.91E-02 | 0.2245   | 1.07E-04 | 1.39E-04 | 3.08E-06 | 7.35E-04 | 0        | 0        |
| VE9-0472 | M   | Ct      | 19.94 | 17.66 | 25.79    | 24.10    | 34.70    | 0.00     | 36.16    | 31.85    | 0.00     | 0.00     |
|          |     | Rel Exp | 2.881 | 13.92 | 5.00E-02 | 0.1604   | 1.04E-04 | 0        | 3.77E-05 | 7.47E-04 | 0        | 0        |
| VE9-0515 | M   | Ct      | 18.67 | 16.99 | 25.20    | 23.42    | 32.98    | 34.29    | 37.13    | 31.24    | 0.00     | 0.00     |
|          |     | Rel Exp | 3.726 | 11.97 | 4.02E-02 | 0.1389   | 1.83E-04 | 7.42E-05 | 1.03E-05 | 6.15E-04 | 0        | 0        |
| VE9-0567 | M   | Ct      | 19.90 | 16.78 | 26.60    | 24.58    | 35.69    | 39.46    | 35.79    | 32.56    | 0.00     | 40.00    |
|          |     | Rel Exp | 2.392 | 20.83 | 2.30E-02 | 9.33E-02 | 4.22E-05 | 3.10E-06 | 3.95E-05 | 3.70E-04 | 0        | 2.13E-06 |
| VE9-0687 | M   | Ct      | 19.77 | 17.16 | 25.82    | 24.03    | 32.46    | 33.73    | 36.80    | 31.34    | 0.00     | 0.00     |
|          |     | Rel Exp | 2.143 | 13.14 | 3.24E-02 | 0.1124   | 3.26E-04 | 1.35E-04 | 1.61E-05 | 7.08E-04 | 0        | 0        |
| VE9-0817 | M   | Ct      | 19.80 | 16.64 | 26.66    | 24.31    | 33.94    | 33.76    | 36.04    | 32.25    | 40.00    | 40.00    |
|          |     | Rel Exp | 3.477 | 31.08 | 3.00E-02 | 0.1522   | 1.92E-04 | 2.18E-04 | 4.50E-05 | 6.23E-04 | 2.89E-06 | 2.89E-06 |
| VE9-0039 | F   | Ct      | 20.14 | 17.93 | 27.09    | 25.96    | 34.65    | 37.21    | 35.80    | 33.17    | 0.00     | 0.00     |
|          |     | Rel Exp | 3.918 | 18.11 | 3.16E-02 | 6.93E-02 | 1.68E-04 | 2.84E-05 | 7.56E-05 | 4.66E-04 | 0        | 0        |
| VE9-0307 | F   | Ct      | 21.30 | 18.15 | 27.56    | 25.47    | 33.66    | 37.37    | 40.00    | 33.23    | 0.00     | 0.00     |
|          |     | Rel Exp | 1.55  | 13.75 | 2.01E-02 | 8.61E-02 | 2.93E-04 | 2.25E-05 | 3.63E-06 | 3.95E-04 | 0        | 0        |
| VE9-0697 | F   | Ct      | 20.61 | 17.07 | 27.09    | 24.89    | 33.31    | 34.78    | 40.00    | 36.10    | 0.00     | 0.00     |
|          |     | Rel Exp | 3.512 | 40.63 | 3.92E-02 | 0.1802   | 5.25E-04 | 1.90E-04 | 5.10E-06 | 7.64E-05 | 0        | 0        |
| VE9-0739 | F   | Ct      | 19.82 | 16.66 | 26.25    | 24.44    | 33.16    | 33.70    | 40.00    | 32.02    | 40.00    | 40.00    |
|          |     | Rel Exp | 2.048 | 18.34 | 2.39E-02 | 8.35E-02 | 1.98E-04 | 1.37E-04 | 1.73E-06 | 4.36E-04 | 1.73E-06 | 1.73E-06 |
| VE9-0748 | F   | Ct      | 20.92 | 17.80 | 26.99    | 25.48    | 35.02    | 34.12    | 36.69    | 32.77    | 0.00     | 0.00     |
|          |     | Rel Exp | 1.931 | 16.85 | 2.88E-02 | 8.18E-02 | 1.10E-04 | 2.05E-04 | 3.46E-05 | 5.24E-04 | 0        | 0        |
| VE9-1036 | F   | Ct      | 21.67 | 17.79 | 27.47    | 26.04    | 34.68    | 31.43    | 40.00    | 36.16    | 40.00    | 40.00    |
|          |     | Rel Exp | 1.079 | 15.9  | 1.94E-02 | 5.24E-02 | 1.31E-04 | 1.25E-03 | 3.28E-06 | 4.71E-05 | 3.28E-06 | 3.28E-06 |
| VE9-1050 | F   | Ct      | 21.03 | 17.01 | 27.60    | 0.00     | 34.67    | 34.87    | 35.91    | 32.63    | 36.65    | 0.00     |
|          |     | Rel Exp | 1.072 | 17.39 | 1.13E-02 | 0        | 8.40E-05 | 7.35E-05 | 3.57E-05 | 3.47E-04 | 2.13E-05 | 0        |
